# Supplementary material
Source: PubMed Central journal article supplement (PMC3346428)
Supplement: supp_11.5.638_SuppMaterial.pdf [file supp_11.5.638_SuppMaterial.pdf]

Table S1. Primer sequences used in this study

| Primer               | Sequence (5' to 3')                      |
|----------------------|------------------------------------------|
| <i>rnIA</i> -forward | GGCGCTGGTGAAATAGTAAG                     |
| <i>rnIA</i> -reverse | TCTTTAGAAGGTTACCGCCC                     |
| <i>macA</i> -forward | CAAATAGTTTAGAATATTTAAATCCTTTTAATATATCTTC |
| <i>macA</i> -reverse | CATATTGTAAAAAATTGGAGGATCCATTTG           |
| Fragment 1-forward   | CAGTCACAACCATCTCCGATG                    |
| Fragment 1-reverse   | GCAACTGAAGATTCACAACC                     |
| Fragment 2-forward   | TGGGTCAGAACATCTATCTC                     |
| Fragment 2-reverse   | CGTTCATTTAAGAGTGGTCG                     |
| Fragment 3-forward   | GTGTATCACCATTGGAGGCAG                    |
| Fragment 3-reverse   | CCTTCAATGGTAATACCAGC                     |
| Fragment 4-forward   | AGTCCTACCAACTTCTTTAC                     |
| Fragment 4-reverse   | CTACCAGTTCAACTTTAATCGG                   |
| Fragment 5-forward   | CTGCTGCCACTACCTGAAG                      |
| Fragment 5-reverse   | CTCTCAGTAATTGAGTTCTCC                    |

Table S2. Detection of MacA peptides in crude membrane fractions<sup>a</sup>

| #  | Peptide                | Position |       | Type-I |      | Type-II |     | Type-III |      |
|----|------------------------|----------|-------|--------|------|---------|-----|----------|------|
|    | Sequence               | start    | end   | FC     | ICL  | FC      | ICL | FC       | ICL  |
| 1  | YPTTLNSPSFIINK         | 50       | 63    | 4.5    | 2.8  | 1.7     | 1.5 | 2.5      | 2.4  |
| 2  | SQPCEQYTFSNMNPISINK    | 65       | 82    | 1.5    | 0.9  | -       | -   | -        | -    |
| 3  | SNSYWNEMIEQIK          | 180      | 192   | 3.0    | 1.9  | -       | -   | 0.8      | 0.8  |
| 4  | LIINNFILNSQPPIPK       | 193      | 208   | 1.5    | 1.9  | -       | -   | -        | -    |
| 5  | NIQSLLSPIDPLILSDPLK    | 209      | 227   | -      | 5.7  | -       | -   | -        | -    |
| 6  | SIESNLFLISNLIK         | 373      | 386   | -      | 5.7  | -       | -   | -        | -    |
| 7  | ITFEDICYCR             | 446      | 455   | -      | 0.9  | -       | -   | 0.8      | -    |
| 8  | FITSSLFSNVVK           | 507      | 518   | 3.0    | 4.7  | -       | 1.5 | 0.8      | 1.6  |
| 9  | DIPENTIASFLLSNGK       | 598      | 613   | 7.4    | 5.7  | -       | -   | -        | -    |
| 10 | IGISPFPCPYLCGLPK       | 614      | 628   | -      | 1.9  | -       | -   | -        | -    |
| 11 | LGFGSNGITDSCLVTPK      | 678      | 694   | -      | 0.9  | -       | -   | -        | -    |
| 12 | YQLIFTNSDYNSPR         | 695      | 708   | 4.5    | 2.8  | -       | -   | 1.7      | 1.6  |
| 13 | NILPTDFLNR             | 709      | 718   | -      | 1.9  | -       | -   | -        | 0.8  |
| 14 | ATTIEMWLK              | 719      | 727   | -      | 0.9  | -       | -   | -        | -    |
| 15 | TITPSITNPSTQQIIFK      | 761      | 777   | 1.5    | 2.8  | 1.7     | 1.5 | 1.7      | 1.6  |
| 16 | ISFMIDEFK              | 839      | 847   | -      | 0.9  | 0.9     | -   | -        | -    |
| 17 | EFVVNGGLNYCLSK         | 911      | 924   | -      | 0.9  | -       | -   | -        | -    |
| 18 | NLNDPSQCDCIDGEFK       | 932      | 947   | 1.5    | 0.9  | -       | -   | 1.7      | 1.6  |
| 19 | SDNYYSNNIDK            | 965      | 975   | -      | -    | -       | -   | 0.8      | 0.8  |
| 20 | ISITPLPNPTTMK          | 1045     | 1057  | -      | -    | -       | -   | 1.7      | 0.8  |
| 21 | STLPLQANQIDIDYETVSPK   | 1080     | 1099  | 4.5    | 1.9  | -       | -   | -        | 2.4  |
| 22 | SVVPFACIACPTMPTFK      | 1100     | 1116  | -      | 0.9  | -       | -   | -        | -    |
| 23 | ESPSSLSYIYPPTSLLPR     | 1117     | 1134  | 4.5    | 6.6  | -       | -   | -        | 0.8  |
| 24 | NEINSCGCFGR            | 1135     | 1145  | -      | -    | -       | 0.7 | 1.7      | 1.6  |
| 25 | SSFSCMPPLPAPTFTLPSGSYK | 1151     | 1172  | -      | 0.9  | -       | -   | -        | -    |
| 26 | LSSDVASSIYK            | 1233     | 1243  | 4.5    | 2.8  | 0.9     | 0.7 | -        | -    |
| 27 | AIGCINQACSR            | 1441     | 1451  | -      | -    | 0.9     | -   | 0.8      | 0.8  |
| 28 | LTFDFDQLLPTIK          | 1459     | 1471  | -      | 4.7  | -       | -   | -        | -    |
| 29 | TLYQYTLIK              | 1496     | 1504  | 1.5    | 0.9  | -       | -   | 0.8      | -    |
| 30 | FSISAIDCPK             | 1637     | 1646  | 1.5    | -    | 0.9     | -   | 1.7      | 1.6  |
| 31 | DFICSEPSNSEIILR        | 1647     | 1661  | -      | -    | -       | -   | 0.8      | 0.8  |
| 32 | ANSNILDFIYTVEK         | 1744     | 1757  | 5.9    | 6.6  | -       | -   | -        | -    |
| 33 | YLRPNKPIINPGQGGYLDK    | 1758     | 1776  | 4.5    | 1.9  | -       | -   | -        | 0.8  |
| 34 | SNIPLLLIDAIK           | 1808     | 1818  | 3.0    | 2.8  | -       | -   | 1.7      | 1.6  |
| 35 | FILYEYYLK              | 2015     | 2023  | -      | 0.9  | -       | -   | -        | -    |
|    |                        |          | Total | 57.9   | 75.9 | 7.0     | 5.9 | 20.3     | 22.3 |

<sup>a</sup>Normalized to 50,000 hits

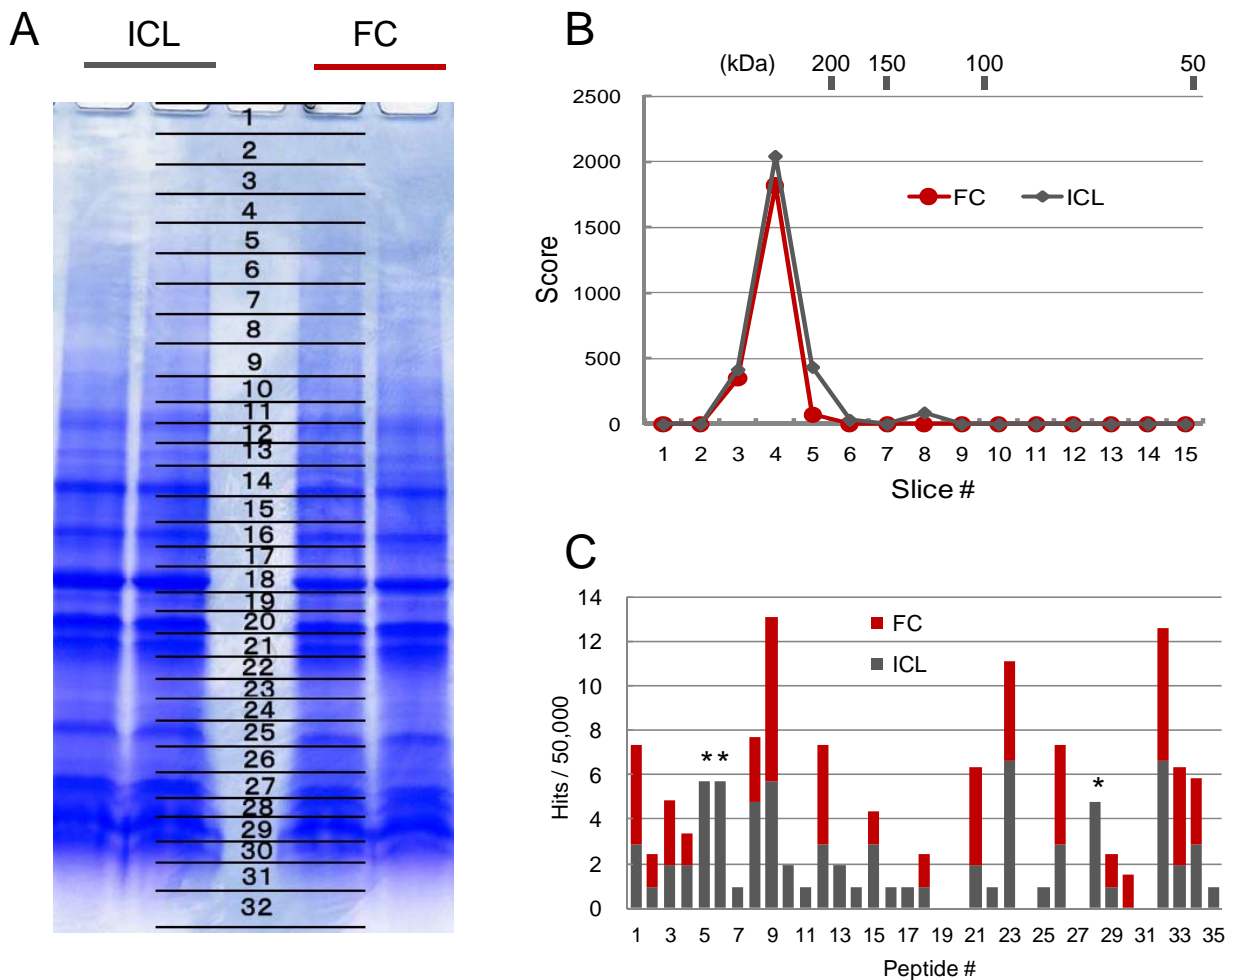

Fig. S1. Detection of the *macA* product. **A**: Crude membrane fractions were prepared from KAX3 FC and ICL cells and their proteins were separated by SDS-PAGE. The gel was horizontally sliced in 32 pieces for proteome analyses by LC/MS/MS. **B**: Scores of the hits to the *MacA*-derived peptides were plotted against the gel slice number. No hits were obtained beyond the 9<sup>th</sup> slice. **C**: Hits to the individual peptides are shown. The peptides were numbered from the N- to C-terminus of the *MacA* sequence (Table S2). The asterisks indicate peptides detected 4/50000 or more in ICL but none in FC cells.
